# Supplementary material for: Is there evidence that walking groups have health benefits? A systematic review and meta-analysis
Source: PubMed Central journal article supplement (PMC4453623; doi:10.1136/bjsports-2014-094157), 2015-01-19

## SUPPLEMENTARY INFORMATION

### Appendix (i) Search syntax for electronic databases

1. "walk\* program\*".af.
2. "walk\* intervention".af.
3. "health walk\*".af.
4. "nordic walk\*".af.
5. "walk\* group\*".af.
6. "walk\* club\*".af.
7. "lay led walk\*".af.
8. "community based walk\*".af.
9. "community walk\*".af.
10. "walk\* scheme\*".af.
11. "walk\* for health".af.
12. "group physical activity". af.
13. 1 or 2 or 3 or 4 or 5 or 6 or 7 or 8 or 9 or 10 or 11 or 12
14. remove duplicates from 13
15. limit 14 to "all adult (19 plus years)"
16. limit 15 to English language

af represents all fields

\* or \$ sign used as truncation wildcard as appropriate to each database

### Appendix (ii) Example funnel plot (systolic blood pressure)

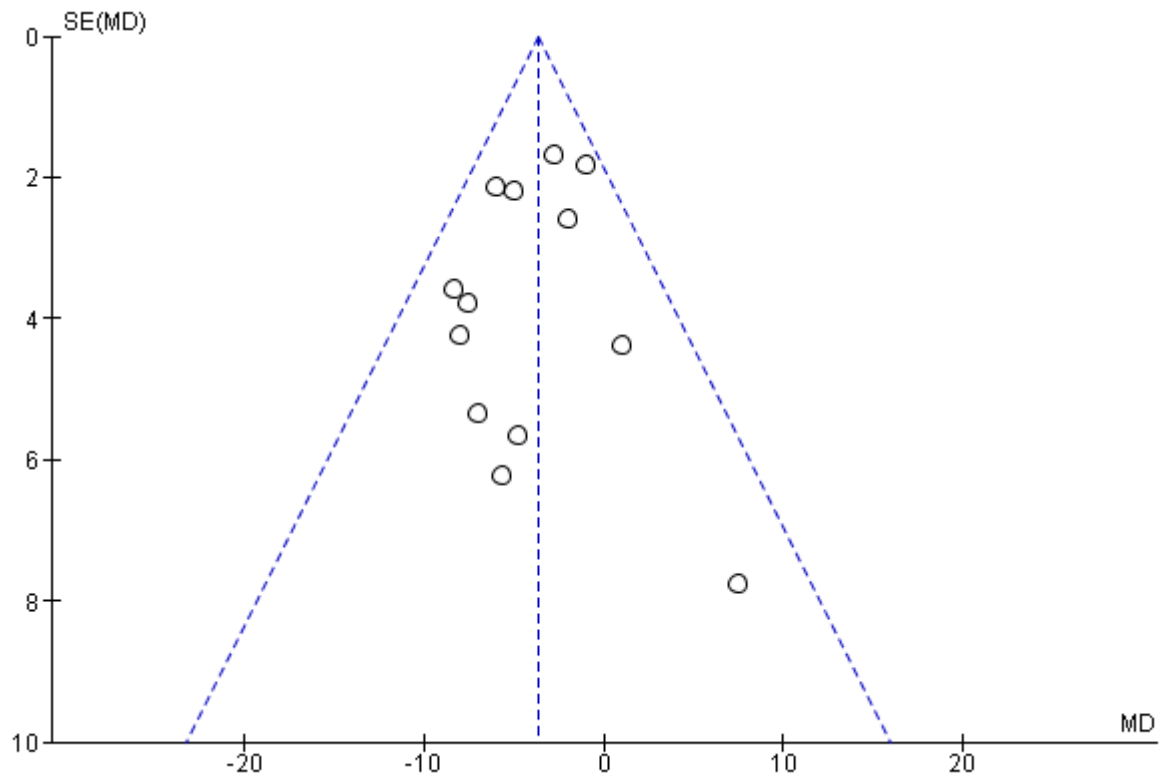

## Appendix (iii) Results from Meta-analysis

### Systolic blood pressure

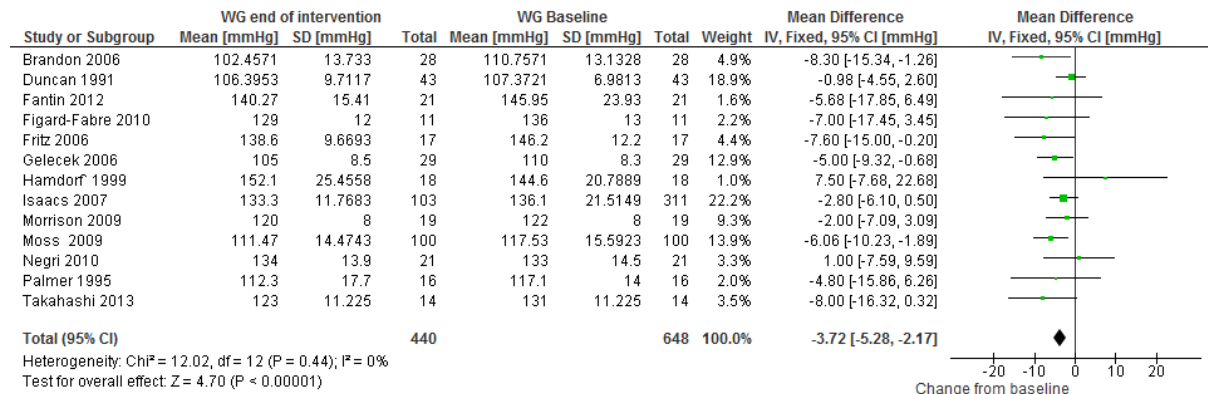

### Diastolic blood pressure

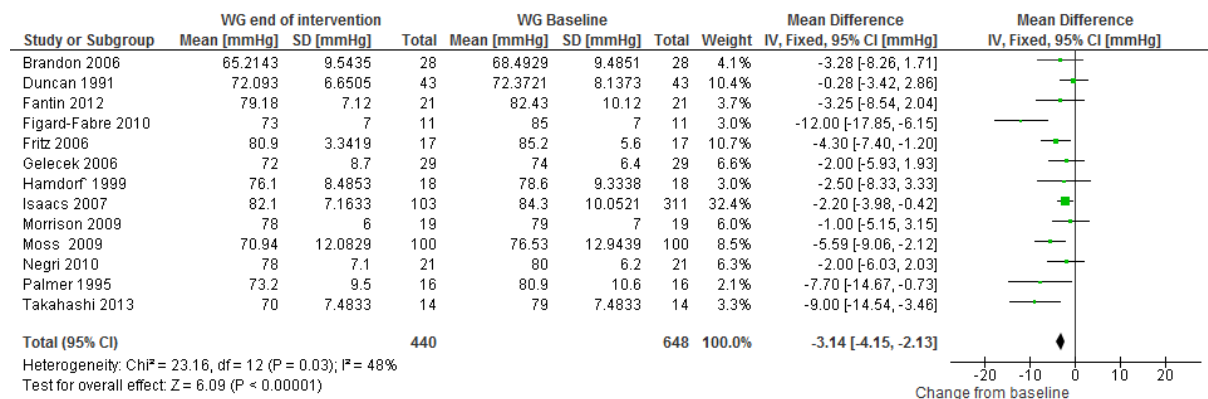

### Resting heart rate

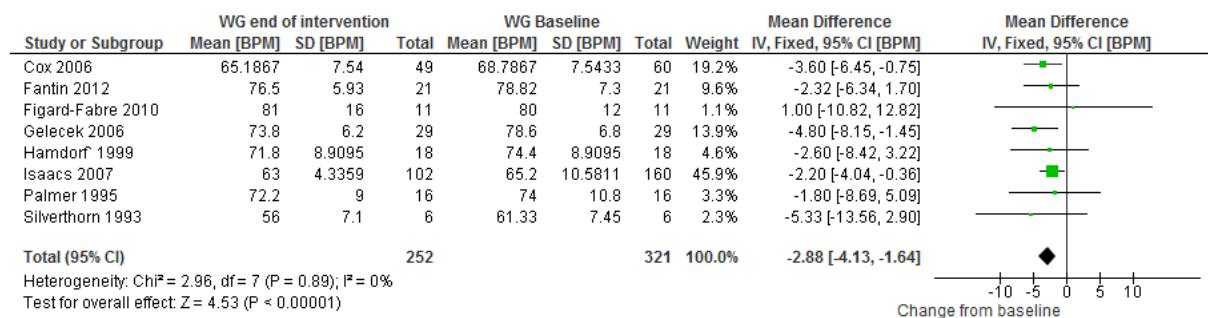

### Body fat

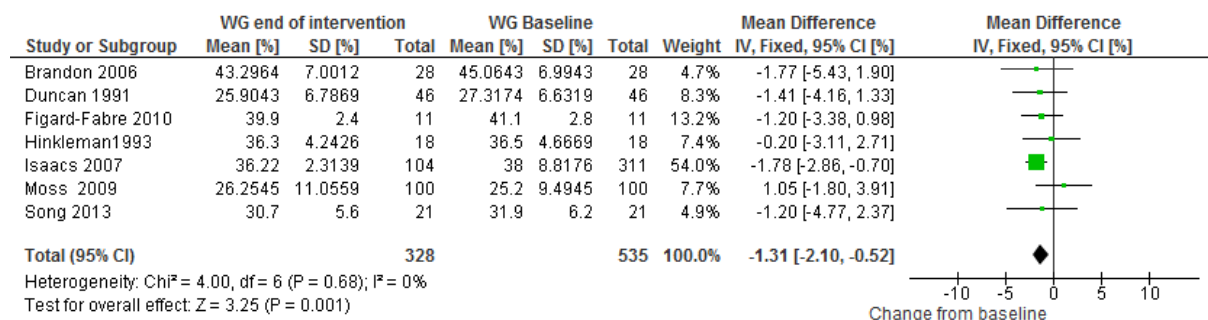

## BMI

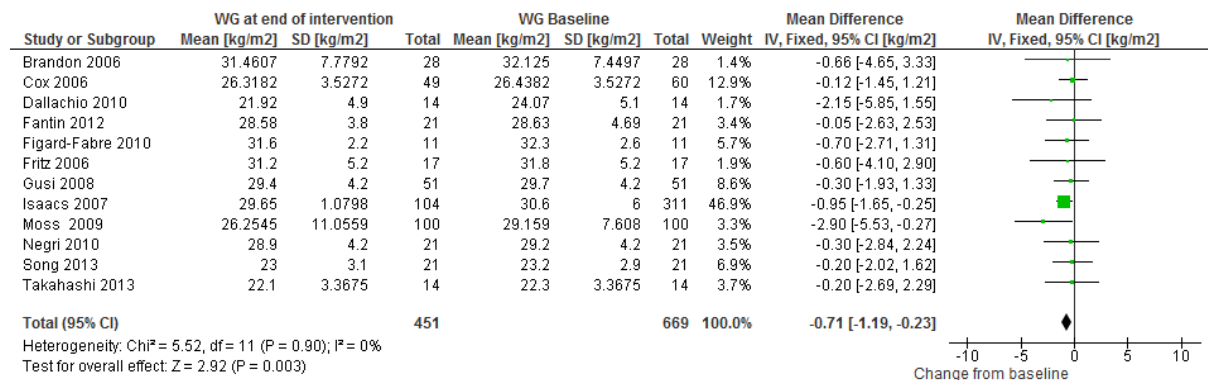

## Total cholesterol

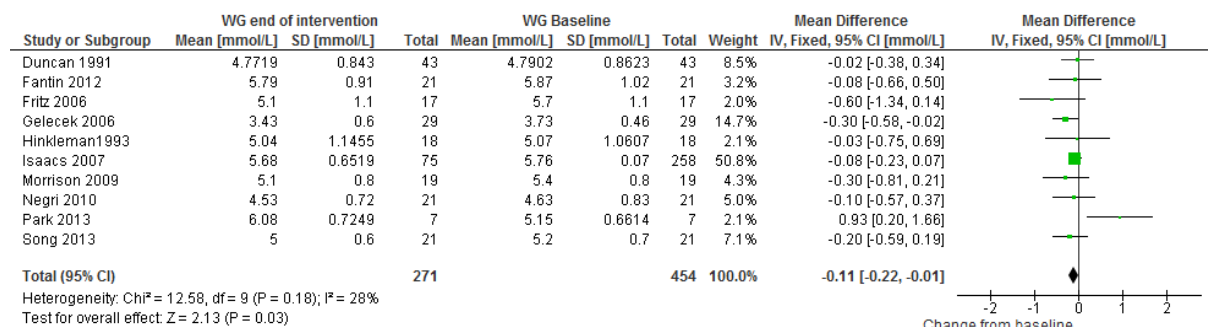

## VO2 max.

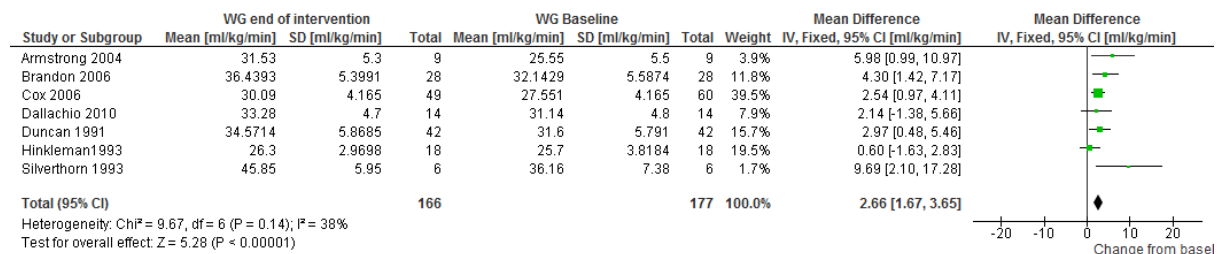

## Quality of life SF36 (physical functioning)

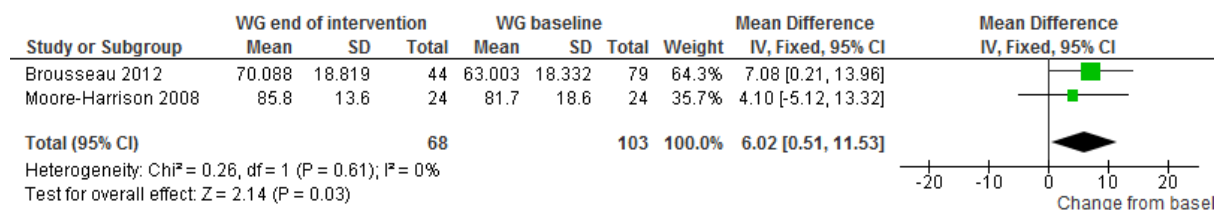

## 6 minute walk test

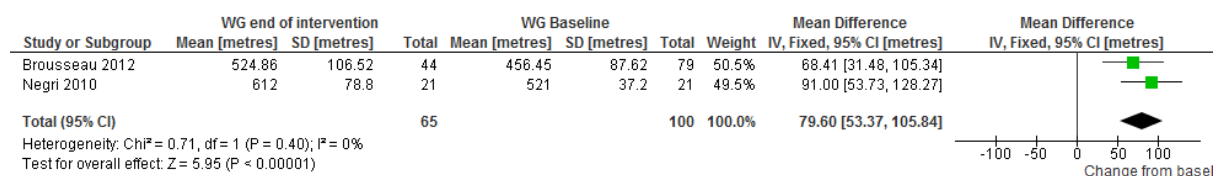

## Depression

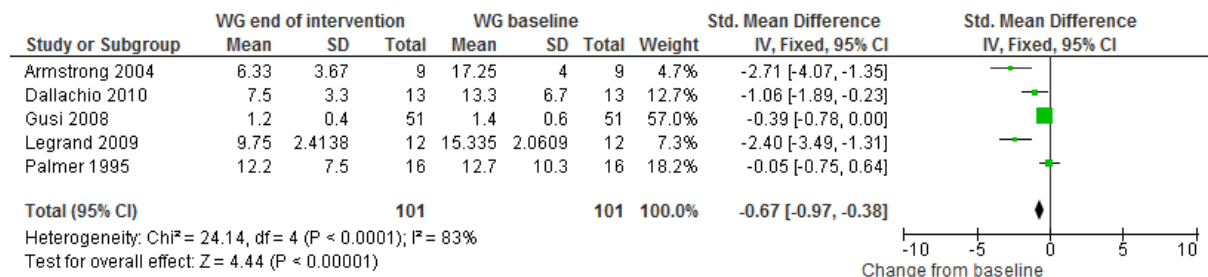

## Waist circumference

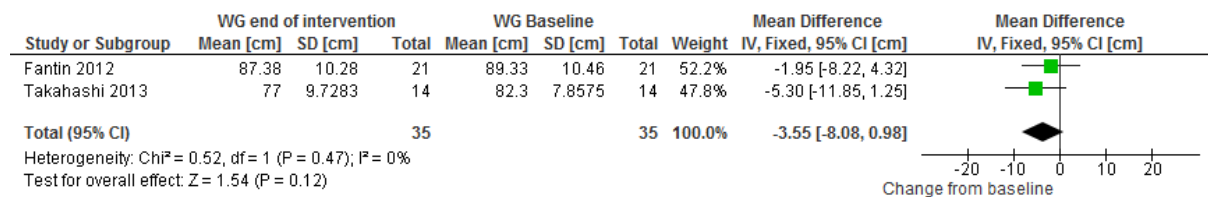

## HbA1C

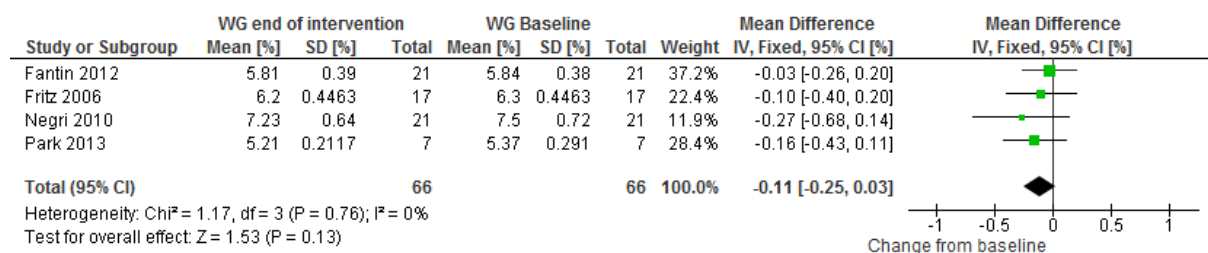

## Glucose

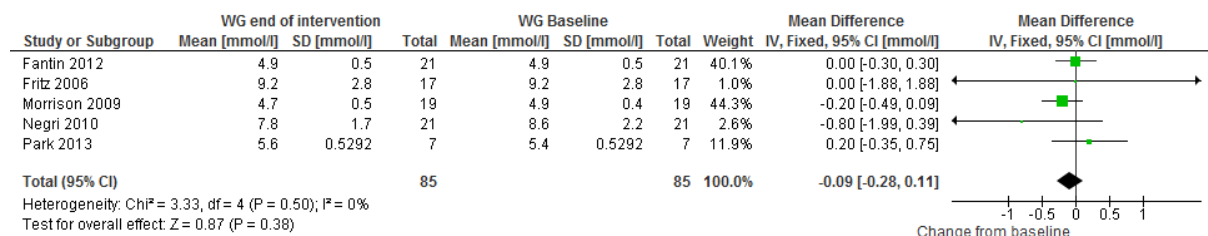

## Low density lipids

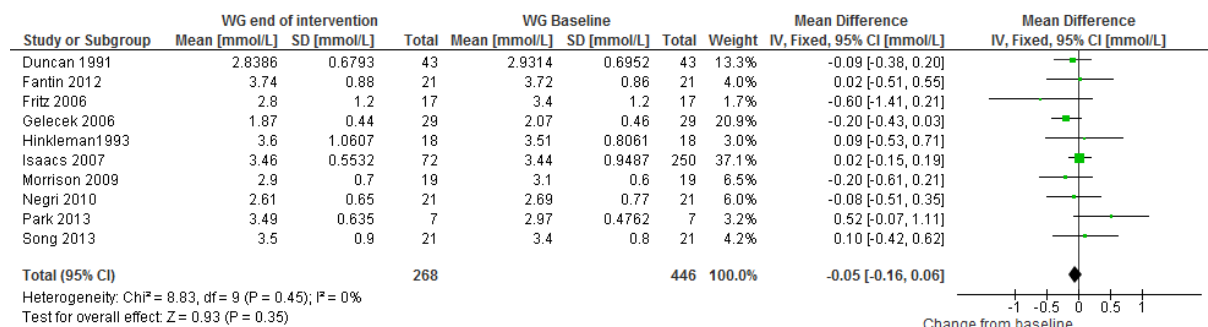

## High density lipids

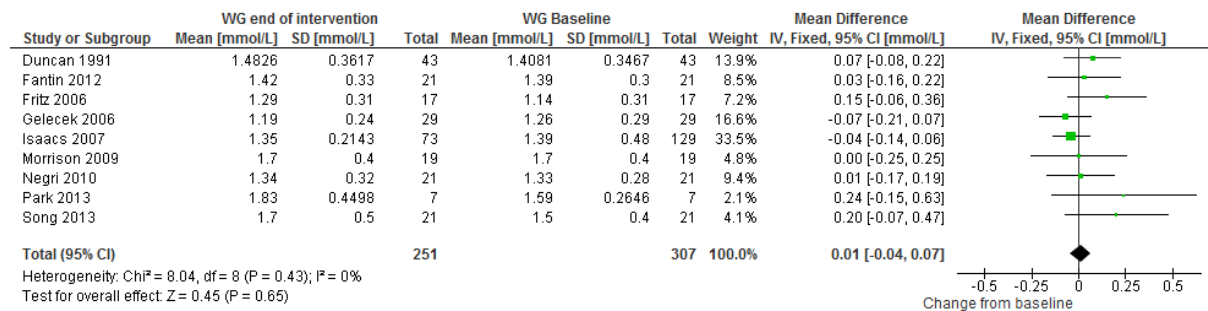

## Triglycerides

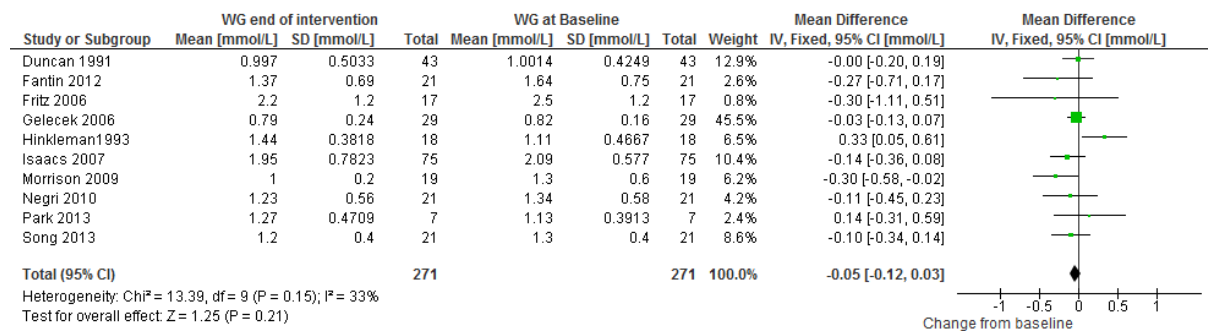

## Quality of life SF36 (mental health index)

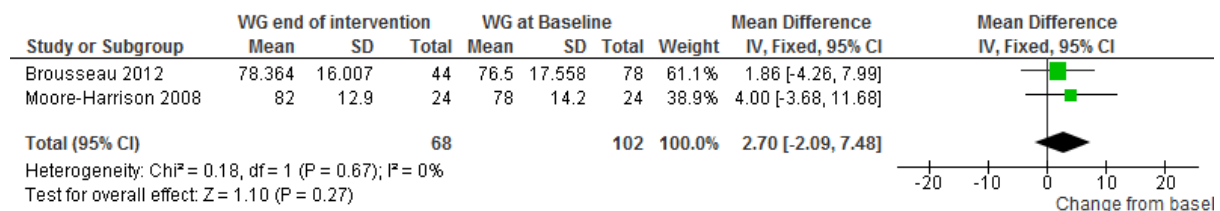

Supplement: bjsports-2014-094157-s1.pdf [file bjsports-2014-094157-s1.pdf]
