# Supplementary material for: Is there evidence that walking groups have health benefits? A systematic review and meta-analysis
Source: PubMed Central journal article supplement (PMC4453623; doi:10.1136/bjsports-2014-094157), 2015-01-19
Supplement: bjsports-2014-094157-s2.pdf [file bjsports-2014-094157-s2.pdf]

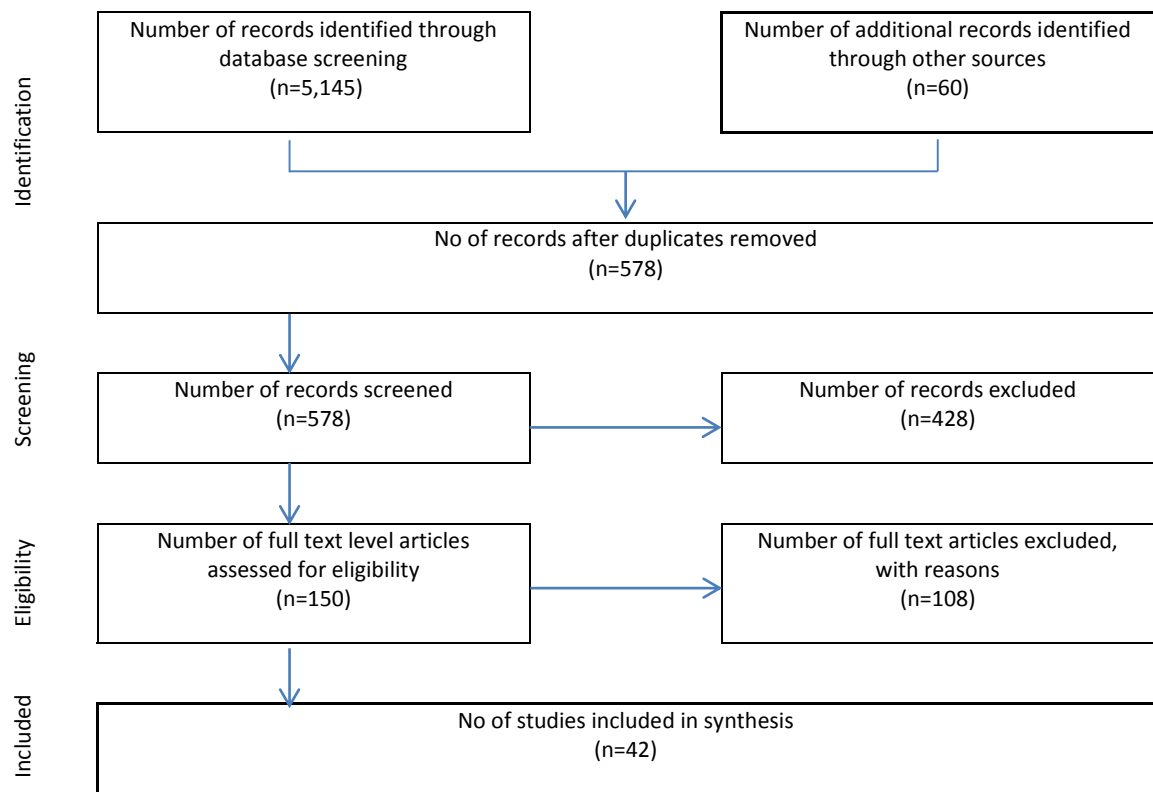

Figure 1: Review flowchart
